# Supplementary material for: Systematic Literature Review and Meta-Analysis of Renal Function in Human Immunodeficiency Virus (HIV)-Infected Patients Treated with Atazanavir (ATV)-Based Regimens
Source: PubMed Central journal article supplement (PMC4418798; doi:10.1371/journal.pone.0124666), 2015-05-04
Supplement: pone.0124666.s001.pdf [file pone.0124666.s001.pdf]

| Search #                          | Topic                               | Detailed Strategy                                                                                                                                             | Number of Hits |
|-----------------------------------|-------------------------------------|---------------------------------------------------------------------------------------------------------------------------------------------------------------|----------------|
| <b>PubMed</b>                     |                                     |                                                                                                                                                               |                |
| #1                                | Disease area                        | "HIV"[Mesh] OR "Acquired Immunodeficiency Syndrome"[Mesh] OR human immunodeficiency virus OR AIDS OR acquired immunodeficiency syndrome                       | 342,959        |
| #2                                | Atazanavir                          | "atazanavir" [Supplementary Concept] or atazanavir or reyataz                                                                                                 | 1,030          |
| #3                                | Exclusion                           | pilot study or "children"                                                                                                                                     | 765,991        |
| #4                                | Results                             | #1 AND #2 NOT #3                                                                                                                                              | 938            |
| #5                                | Total results with limits           | Limit #4: From 2000, Humans, English                                                                                                                          | <b>883</b>     |
| <b>EMBASE</b>                     |                                     |                                                                                                                                                               |                |
| #1                                | Disease area                        | *Human immunodeficiency virus/ or *acquired immune deficiency syndrome/ or HIV.hw.                                                                            | 105,581        |
| #2                                | Atazanavir                          | exp atazanavir plus ritonavir/ or exp atazanavir/ or atazanavir.mp. or reyataz.mp.                                                                            | 4,931          |
| #3                                | Exclusion                           | exp pilot study/ or exp child/ or pilot study.mp. or child.mp. or children.mp.                                                                                | 2,149,206      |
| #4                                | Results                             | #1 AND #2 NOT #3                                                                                                                                              | 692            |
| #5                                | Total results with limits           | Limit #4: From 2000, Humans, English                                                                                                                          | <b>493</b>     |
| <b>Cochrane Library</b>           |                                     |                                                                                                                                                               |                |
| #1                                | Disease area<br>(Limits: 2000-2012) | Human immunodeficiency virus[Mesh]OR "Acquired Immunodeficiency Syndrome"[Mesh] or human immunodeficiency virus or AIDS or acquired immunodeficiency syndrome | 15,464         |
| #2                                | Atazanavir                          | atazanavir or reyataz                                                                                                                                         | 137            |
| #3                                | Exclusion                           | "pilot study" or "children"                                                                                                                                   | 57,714         |
| #4                                | Total results with limits           | (#1 AND #2) NOT (#3)                                                                                                                                          | <b>95</b>      |
| <b>CRD (DARE + HTA + NHS-EED)</b> |                                     |                                                                                                                                                               |                |
| #1                                | Disease area (any fields)           | human immunodeficiency virus or AIDS or acquired immunodeficiency syndrome or HIV                                                                             | 1,468          |
| #2                                | Atazanavir                          | atazanavir or reyataz                                                                                                                                         | 20             |
| #3                                | Total results                       | #1 AND #2                                                                                                                                                     | <b>19</b>      |
| <b>ICAAC</b>                      |                                     |                                                                                                                                                               |                |
| #1                                | ICAAC 2011                          | atazanavir                                                                                                                                                    | 3              |
| #2                                | ICAAC 2012                          | atazanavir                                                                                                                                                    | 10             |
| #3                                | Total results                       | #1 OR #2                                                                                                                                                      | <b>13</b>      |
| <b>IDSA</b>                       |                                     |                                                                                                                                                               |                |
| #1                                | IDSA 2011                           | atazanavir                                                                                                                                                    | 5              |
| #2                                | IDSA 2012                           | atazanavir                                                                                                                                                    | 4              |
| #3                                | Total results                       | #1 OR #2                                                                                                                                                      | <b>9</b>       |
| <b>CROI</b>                       |                                     |                                                                                                                                                               |                |
| #1                                | CROI 2011                           | atazanavir                                                                                                                                                    | 27             |
| #2                                | CROI 2012                           | atazanavir                                                                                                                                                    | 29             |
| #3                                | CROI 2013                           | atazanavir                                                                                                                                                    | 30             |
| #4                                | Total results                       | #1 OR #2 OR #3                                                                                                                                                | <b>86</b>      |
| <b>IAS/AIDS</b>                   |                                     |                                                                                                                                                               |                |
| #1                                | IAS 2011                            | atazanavir                                                                                                                                                    | 31             |
| #2                                | AIDS 2012                           | atazanavir                                                                                                                                                    | 20             |
| #3                                | Total results                       | #1 OR #2                                                                                                                                                      | <b>51</b>      |
| <b>Total Hits</b>                 |                                     |                                                                                                                                                               | <b>1649</b>    |
| <b>Duplicates</b>                 |                                     |                                                                                                                                                               | <b>153</b>     |
| <b>Total Hits (deduplicated)</b>  |                                     |                                                                                                                                                               | <b>1496</b>    |
